# Supplementary material
Source: HighWire-hosted journal article supplement (https://jech.bmj.com/content/73/8/723)
Supplement: inline-supplementary-material-1 [file inline-supplementary-material-1.pdf]

**Table S1. Descriptive statistics for time-variant variables**

|                                    | Ages 0/1<br>N (%) | Ages 2/3<br>N (%) | Ages 5/6<br>N (%) | Total<br>N (%)   |
|------------------------------------|-------------------|-------------------|-------------------|------------------|
| <b>Child Overweight Status:</b>    |                   |                   |                   |                  |
| Normal                             | 1,079<br>(94.90)  | 1,322<br>(97.61)  | 1,175<br>(88.15)  | 3,576<br>(89.87) |
| Overweight/obese                   | 58<br>(5.10)      | 187<br>(12.39)    | 158<br>(11.85)    | 403<br>(10.13)   |
| Total                              | 1,137             | 1,509             | 1,333             | 3,979            |
| <b>Father's weekly work hours:</b> |                   |                   |                   |                  |
| Not employed                       | 125<br>(10.99)    | 132<br>(8.75)     | 87<br>(6.53)      | 344<br>(8.65)    |
| 1-34 hours                         | 50<br>(4.40)      | 86<br>(5.70)      | 81<br>(6.08)      | 217<br>(5.45)    |
| 35-44 hours                        | 506<br>(44.50)    | 663<br>(43.94)    | 579<br>(43.44)    | 1,748<br>(43.93) |
| 45 or more hours                   | 456<br>(40.11)    | 628<br>(41.62)    | 586<br>(43.96)    | 1,670<br>(41.97) |
| Total                              | 1,137             | 1,509             | 1,333             | 3,979            |
| <b>Mother's weekly work hours:</b> |                   |                   |                   |                  |
| Not employed                       | 956<br>(84.08)    | 703<br>(46.59)    | 437<br>(32.78)    | 2,096<br>(52.68) |
| 1-24 hours                         | 107<br>(9.41)     | 399<br>(26.44)    | 453<br>(33.98)    | 959<br>(24.10)   |
| 25-34 hours                        | 21<br>(1.85)      | 173<br>(11.46)    | 215<br>(16.13)    | 409<br>(10.28)   |
| 35 or more hours                   | 53<br>(4.66)      | 234<br>(15.51)    | 228<br>(17.10)    | 515<br>(12.94)   |
| Total                              | 1,137             | 1,509             | 1,333             | 3,979            |
| <b>Family income:</b>              |                   |                   |                   |                  |
| Below median                       | 736<br>(64.73)    | 739<br>(48.97)    | 484<br>(36.31)    | 1,959<br>(49.23) |
| Above median                       | 401<br>(35.27)    | 770<br>(51.03)    | 849<br>(63.69)    | 2,020<br>(50.77) |
| Total                              | 1,137             | 1,509             | 1,333             | 3,979            |
| <b>Number of siblings:</b>         |                   |                   |                   |                  |
| 0                                  | 468<br>(41.16)    | 412<br>(27.30)    | 191<br>(14.33)    | 1,071<br>(26.92) |
| 1                                  | 460<br>(40.46)    | 714<br>(47.32)    | 693<br>(51.99)    | 1,867<br>(46.92) |
| 2 or more                          | 209<br>(23.4)     | 383<br>(29.2)     | 449<br>(37.8)     | 1,041<br>(26.16) |
| Total                              | 1,137             | 1,509             | 1,333             | 3,979            |
| <b>Child care attendance:</b>      |                   |                   |                   |                  |
| No                                 | 1,090<br>(95.87)  | 630<br>(41.75)    | 260<br>(19.50)    | 1,980<br>(48.7)  |
| Yes                                | 47<br>(4.13)      | 879<br>(58.25)    | 1,073<br>(80.50)  | 1,999<br>(51.3)  |
| Total                              | 1,137             | 1,509             | 1,333             | 3,979            |

**Table S1 continued**

|                            | Ages 0/1        | Ages 2/3         | Ages 5/6         | Total            |
|----------------------------|-----------------|------------------|------------------|------------------|
| <b>Father's age:</b>       |                 |                  |                  |                  |
| Mean (SD):                 | 31.77<br>(5.16) | 34.15<br>(5.16)  | 37.17<br>(5.24)  | 37.55<br>(6.19)  |
| Min                        | 18              | 19               | 22               | 19               |
| Max                        | 45              | 51               | 52               | 68               |
| Total                      | 1,137           | 1,509            | 1,333            | 3,979            |
| <b>Mother's age:</b>       |                 |                  |                  |                  |
| Mean (SD):                 | 31.77<br>(5.16) | 34.15<br>(5.16)  | 37.17<br>(5.24)  | 34.48<br>(5.61)  |
| Min                        | 18              | 19               | 22               | 18               |
| Max                        | 45              | 51               | 52               | 52               |
| Total                      | 1,137           | 1,509            | 1,333            | 3,979            |
| <b>Married/cohabiting:</b> |                 |                  |                  |                  |
| Married                    | 889<br>(78.19)  | 1,314<br>(87.08) | 1,209<br>(90.70) | 3,412<br>(85.75) |
| Cohabiting                 | 248<br>(21.81)  | 195<br>(12.92)   | 124<br>(9.30)    | 567<br>(14.25)   |
| Total                      | 1,137           | 1,509            | 1,333            | 3,979            |
| <b>Father's BMI:</b>       |                 |                  |                  |                  |
| Mean (SD)                  | 25.89<br>(3.69) | 26.36<br>(3.99)  | 26.67<br>(4.23)  | 26.33<br>(4.00)  |
| Min                        | 16.33           | 17.24            | 15.60            | 15.60            |
| Max                        | 53.69           | 54.06            | 57.10            | 57.10            |
| Total                      | 1,137           | 1,509            | 1,333            | 3,979            |
| <b>Mother's BMI:</b>       |                 |                  |                  |                  |
| Mean (SD)                  | 24.71<br>(4.54) | 24.64<br>(4.89)  | 25.18<br>(5.28)  | 24.84<br>(4.93)  |
| Min                        | 16.51           | 12.03            | 15.52            | 12.03            |
| Max                        | 49.54           | 63.29            | 63.29            | 63.29            |
| Total                      | 1,137           | 1,509            | 1,333            | 3,979            |
| <b>Father smokes:</b>      |                 |                  |                  |                  |
| No                         | 695<br>(61.13)  | 966<br>(64.02)   | 909<br>(68.19)   | 2,570<br>(64.59) |
| Yes                        | 442<br>(38.87)  | 543<br>(35.98)   | 424<br>(31.81)   | 1,409<br>(35.41) |
| Total                      | 1,137           | 1,509            | 1,333            | 3,979            |
| <b>Mother smokes:</b>      |                 |                  |                  |                  |
| No                         | 940<br>(82.67)  | 1,189<br>(78.79) | 1,061<br>(79.59) | 3,109<br>(80.17) |
| Yes                        | 197<br>(17.33)  | 320<br>(21.21)   | 272<br>(20.41)   | 789<br>(19.83)   |
| Total                      | 1,137           | 1,509            | 1,333            | 3,979            |

**Table S2. Descriptive statistics for time-invariant variables: Ages 0-6**

|                                | Mean    | SD   | Min | Max |
|--------------------------------|---------|------|-----|-----|
| Father's education in years:   | 12.96   | 2.97 | 7   | 18  |
| Total                          | 3,979   |      |     |     |
| Mother's education in years:   | 13.02   | 2.79 | 7   | 18  |
| Total                          | 3,979   |      |     |     |
| <hr/>                          |         |      |     |     |
| Father's migration background: |         |      |     |     |
| No                             | 2,977   |      |     |     |
|                                | (74.82) |      |     |     |
| Yes                            | 1,002   |      |     |     |
|                                | (25.18) |      |     |     |
| Total                          | 3,979   |      |     |     |
| Mother's migration background: |         |      |     |     |
| No                             | 2,969   |      |     |     |
|                                | (74.62) |      |     |     |
| Yes                            | 1,010   |      |     |     |
|                                | (25.38) |      |     |     |
| Total                          | 3,979   |      |     |     |
| Region:                        |         |      |     |     |
| West Germany                   | 3,103   |      |     |     |
|                                | (77.98) |      |     |     |
| East Germany                   | 876     |      |     |     |
|                                | (22.02) |      |     |     |
| Total                          | 3,979   |      |     |     |
| Child gender:                  |         |      |     |     |
| Boy                            | 2,027   |      |     |     |
|                                | (50.94) |      |     |     |
| Girl                           | 1,952   |      |     |     |
|                                | (49.06) |      |     |     |
| Total                          | 3,979   |      |     |     |
